# Supplementary material for: Distinct supramolecular assemblies of Fe(iii) and Ni(ii) complexes constructed from the o-vanillin salicylhydrazone ligand: syntheses, crystal structures, DNA/protein interaction, and antioxidant and cytotoxic activity
Source: Royal Society of Chemistry journal article supplement (doi:10.1039/c8nj06530f), 2019-01-01
Supplement: c8nj06530f1.pdf [file c8nj06530f1.pdf]

## Electronic Supplementary Information

For

**Distinct supramolecular assemblies of Fe(III) and Ni(II) complexes  
constructed from o-vanillin salicylhydrazone ligand: syntheses,  
crystal structures, DNA/protein interaction, antioxidant and  
cytotoxic activity**

Yueqin Li,<sup>\*ab</sup> Yun Li,<sup>a</sup> Zhiwei Yang,<sup>a</sup> Fantao Meng,<sup>a</sup> Nana Wang,<sup>a</sup> Minya Zhou,<sup>a</sup>

Zongbiao Xia,<sup>a</sup> Qiang Gong<sup>a</sup>, Qinwei Gao<sup>a</sup>

<sup>a</sup>College of Chemical Engineering, Jiangsu Key Lab for the Chemistry & Utilization  
of Agricultural and Forest Biomass, Nanjing Forestry University, Nanjing 210037,  
China

<sup>b</sup>Co-Innovation Center of Efficient Processing and Utilization of Forest Resources,  
Nanjing Forestry University, Nanjing 210037, China

Corresponding author email: yueqinli@njfu.edu.cn

List of items:

1. Figure S1 <sup>1</sup>H and <sup>13</sup>C NMR spectra of H<sub>2</sub>L.
2. Figure S2 ESI-MS of Fe(III) complex.
3. Figure S3 ESI-MS of Ni(II) complex.
4. Figure S4 Stability studies of the H<sub>2</sub>L and complexes using UV-Vis absorption spectroscopic technique in 99: 1 tris HCl buffer : DMSO mixture and 99: 1 phosphate buffer: DMSO mixture.
5. Figure S5 Absorption spectra of binding of H<sub>2</sub>L, Fe(III) and Ni(II) complex with BSA.
6. Figure S6 Crystal structure of bovine serum albumin 4F5S.

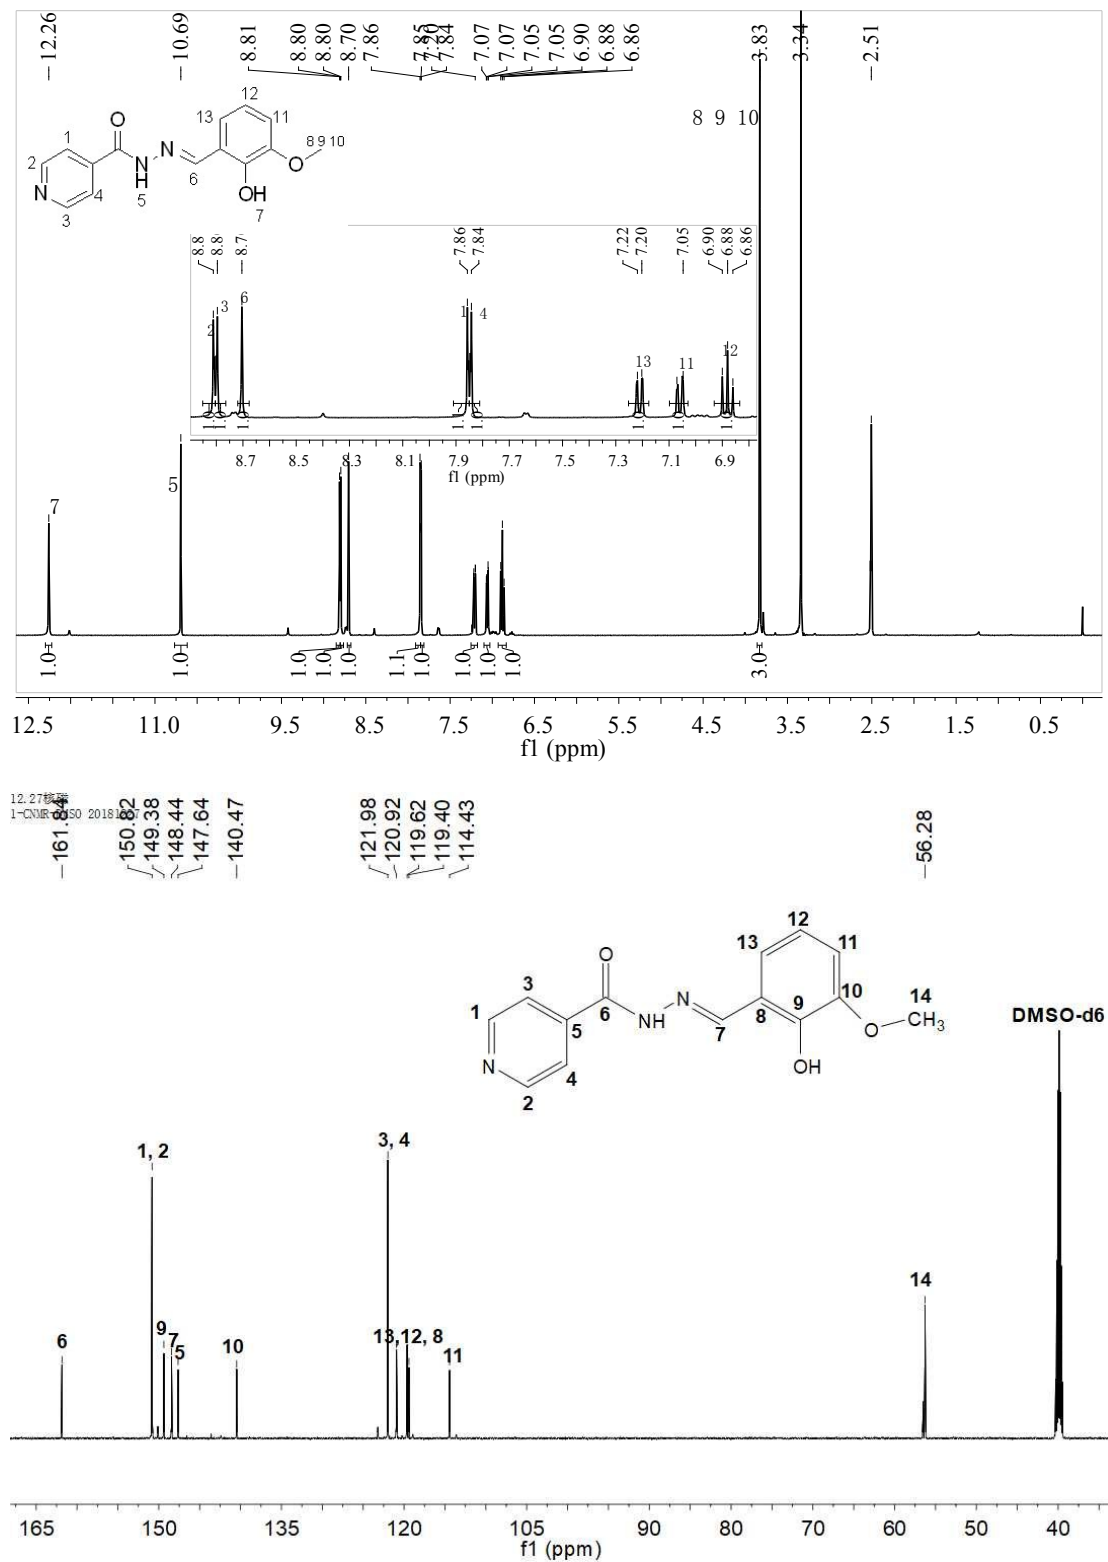

Figure S1 <sup>1</sup>H NMR spectra of H<sub>2</sub>L.

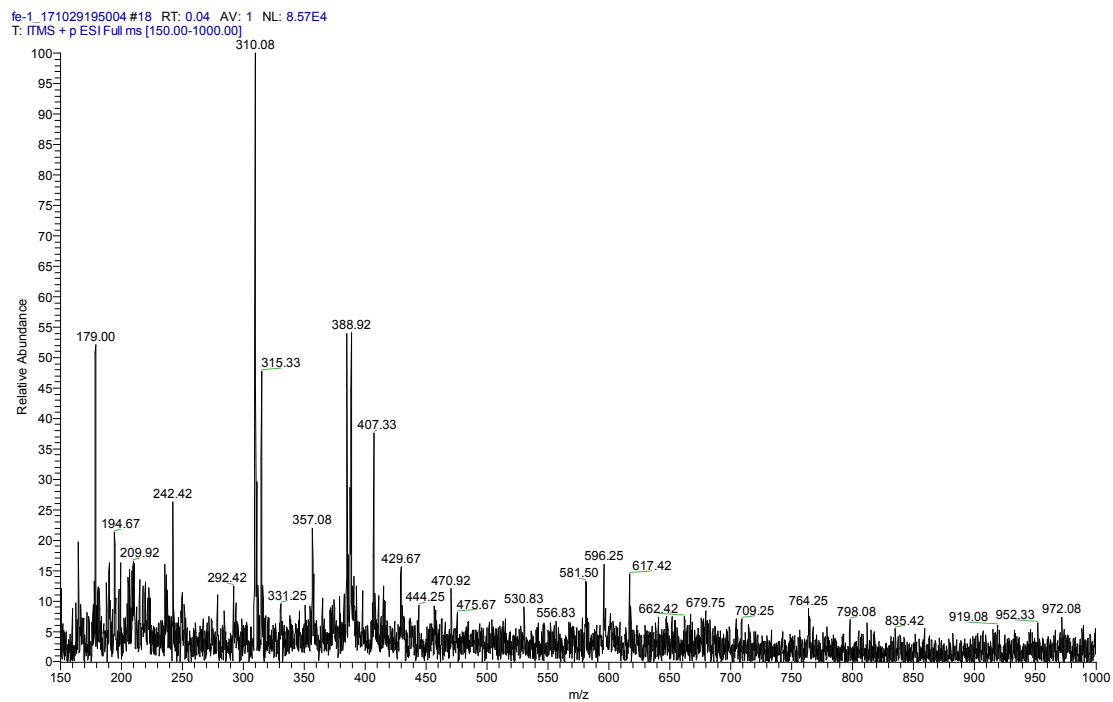

Figure S2 ESI-MS spectrum of Fe(III) complex.

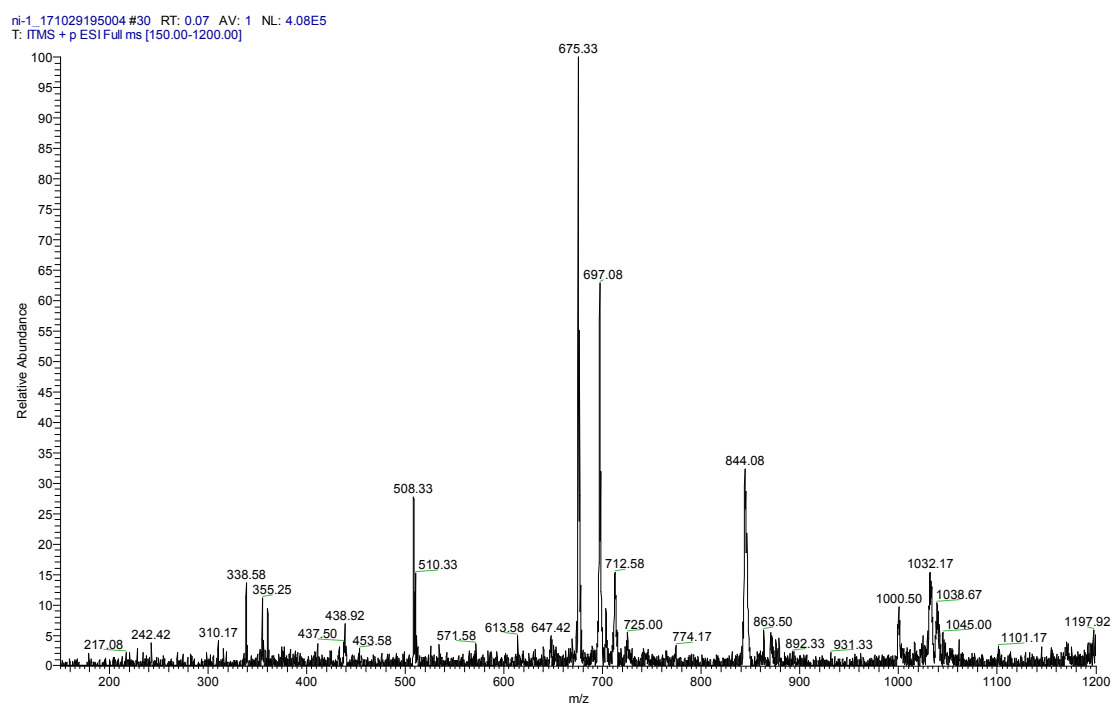

Figure S3 ESI-MS spectrum of Ni(II) complex.

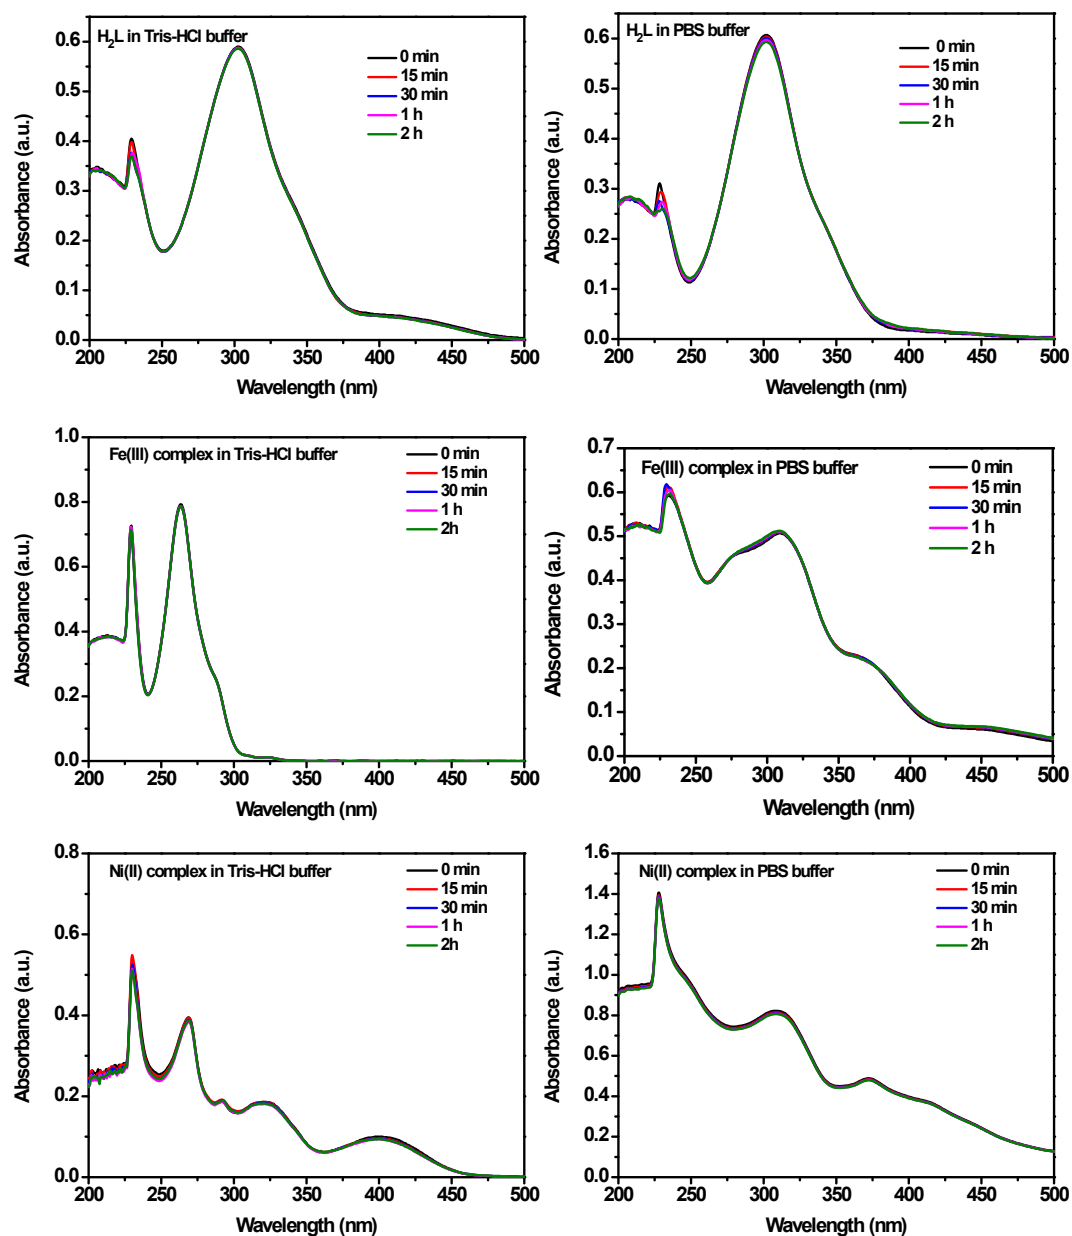

Figure S4 Stability studies of the  $H_2L$  and complexes using UV-Vis absorption spectroscopic technique in 99: 1 tris HCl buffer : DMSO mixture and 99: 1 phosphate buffer: DMSO mixture.

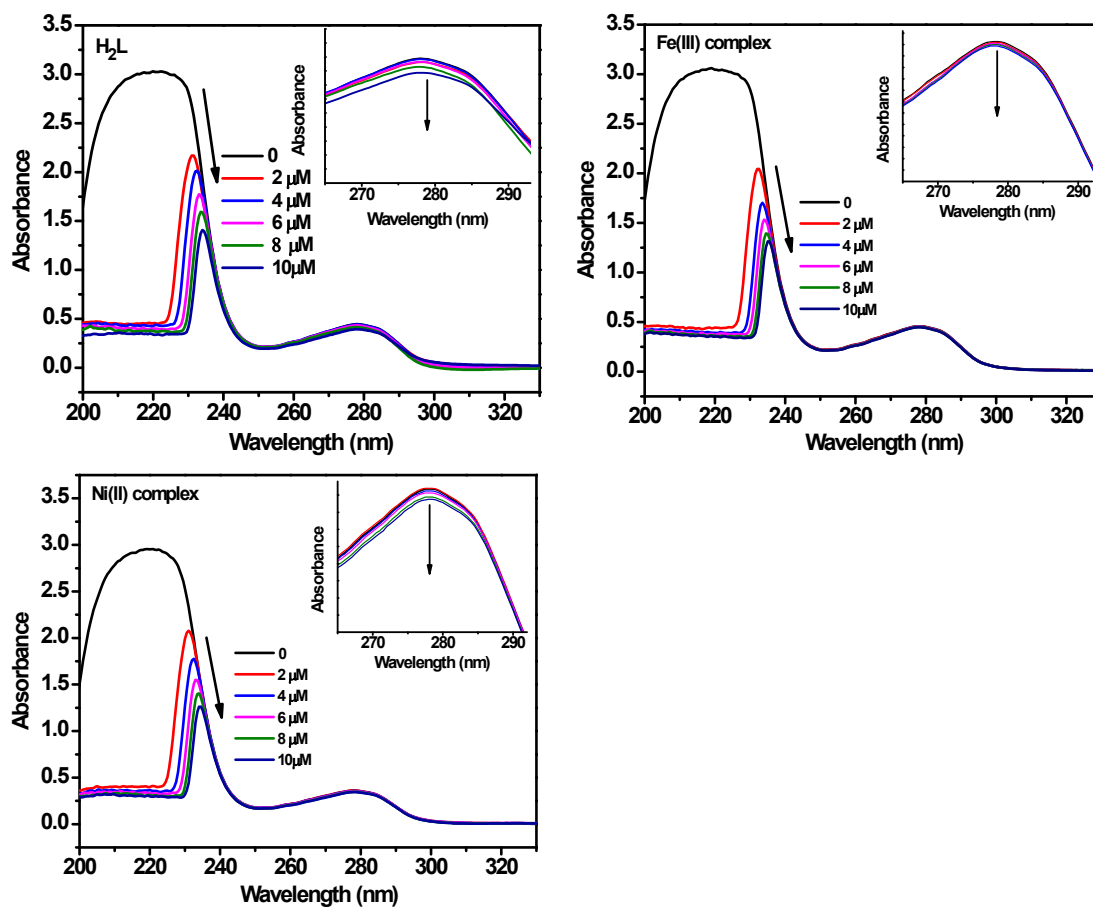

Figure S5 Absorption spectra of binding of H<sub>2</sub>L, Fe(III) and Ni(II) complex with BSA. [BSA] = 1 μM, [compound] = 2, 4, 6, 8, 10 μM.

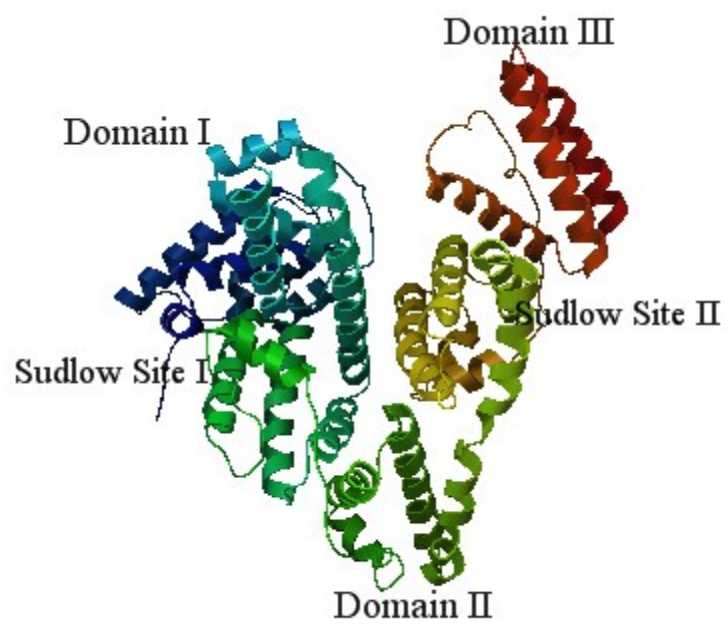

Figure S6 Crystal structure of bovine serum albumin 4F5S.
